# Supplementary material for: Effect of exenatide on the cardiac expression of adiponectin receptor 1 and NADPH oxidase subunits and heart function in streptozotocin-induced diabetic rats
Source: Springer Nature journal article supplement (doi:10.1186/1758-5996-6-29), 2014-02-28

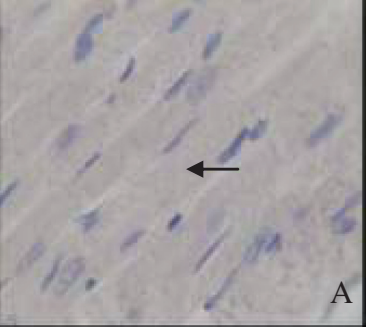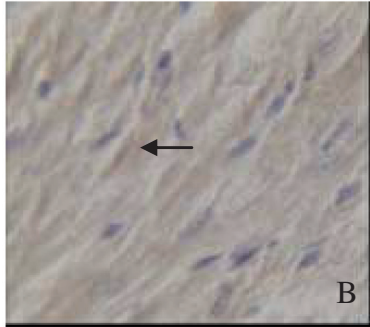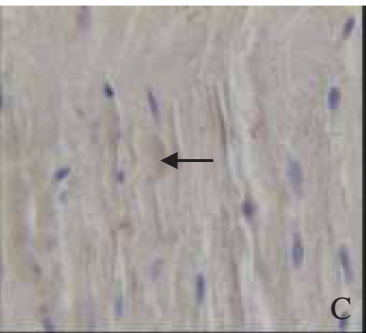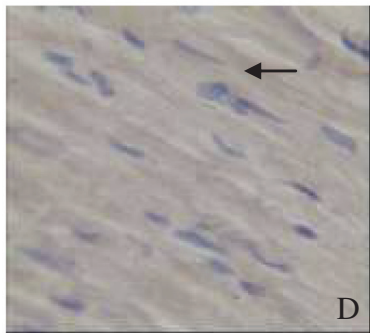

The average value of gray scale of adipoR1 in the heart

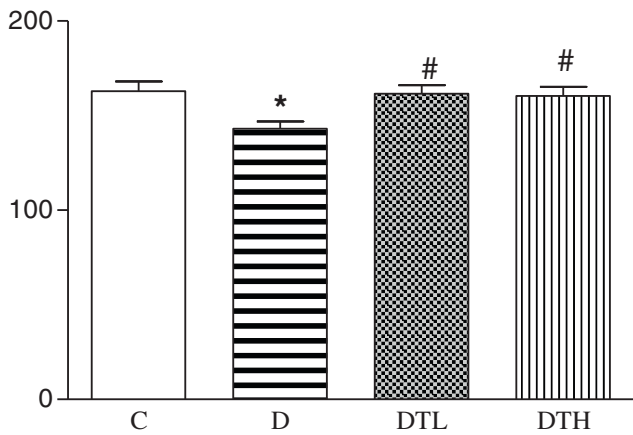

Supplement: 13098_2013_300_MOESM2_ESM.pdf [file 13098_2013_300_MOESM2_ESM.pdf]
